# Supplementary figures and images for: Viral biogeography of gastrointestinal tract and parenchymal organs in two representative species of mammals
Source: Research Square preprint supplement (doi:10.21203/rs.3.rs-803286/v1), 2021-09-01

**A**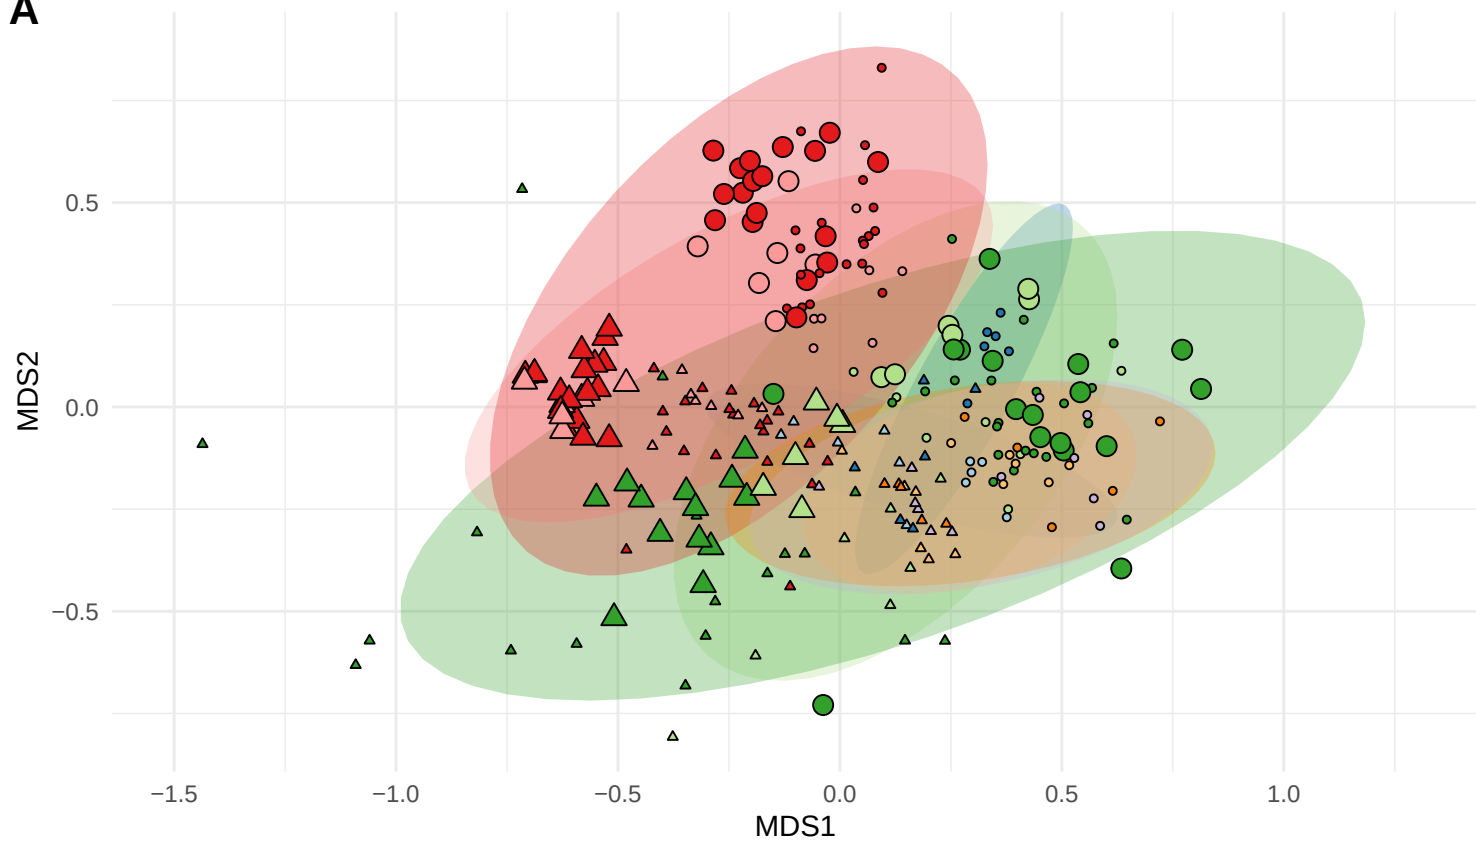**B**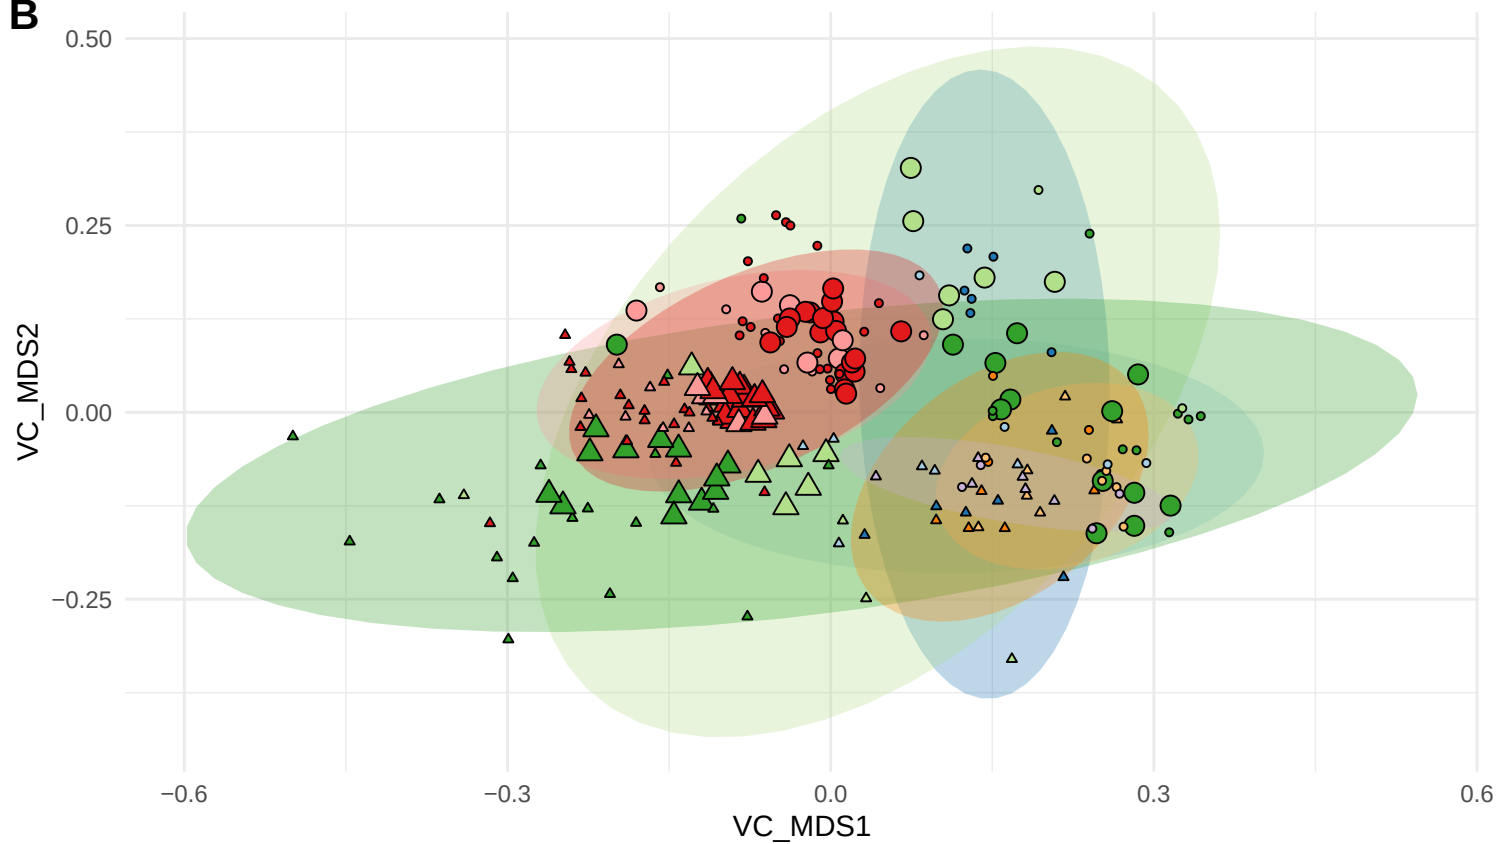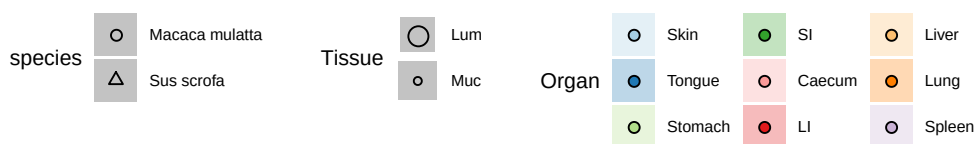

Supplement: Supplementary file 2 [file 7c7738179186d39b5a629d34.pdf]
